# Supplementary material
Source: publisher figshare collection journal article supplement (https://gsajournals.figshare.com/ndownloader/files/26663579)
Supplement: Supplementary file 1 [file 26663579]

## Sheet: S Table 1
Table S1. Genetic characterization of the population. A) Summary information on the distribution, MAF and heterozygosity of the 9 928 SNP loci. B) Observed heterozygosity (Ho) among the 334 genotypes
A		The rice 12 chromosomes
	Chr	Os01	Os02	Os03	Os04	Os05	Os06	Os07	Os08	Os09	Os10	Os11	Os12	All
	Size (bp)	43179539	35891034	36403807	35391250	29954718	31000883	29653386	28382303	22879956	23160871	28806417	27498173	372202337
	Number	1420	1091	1194	553	589	828	881	677	409	611	1054	621	9928
	Density	30408.1	32897.4	30489	63998.6	50856.9	37440.7	33658.8	41923.6	55941.2	37906.5	27330.6	44280.5	40594.3
Distribution of distances (bp) between two adjacent SNP loci	Minimum	1	1	1	1	1	1	1	1	1	1	1	1	1
	1st Quartile	32	34	40	19	16	17	18	32	17	26.5	12	21	23
	Median	10142.5	11494	10537.5	8953	6676	7491.5	7123	15476	9666	12314	3094	10400	9082
	Average	30408	32897	30489	63999	50857	37441	33659	41924	55941	37906	27331	44280	37490
	3rd Quartile	35316.5	38327	39303.8	48947	39108	38980.2	36728	49010	64973	48416	33443.2	53539	41156
	Maximum	2197892	711533	794696	1951759	2209631	1196222	1499537	773794	1188875	677358	528305	792342	2209631
Distribution of the minor allele frequency (MAF)	Minimum	0.0211082	0.0224274	0.0171504	0.0197889	0.0211082	0.0184697	0.0224274	0.0224274	0.0224274	0.0211082	0.0197889	0.0211082	0.01715
	1st Quartile	0.0659631	0.0686016	0.0686016	0.085752	0.0567282	0.103892	0.0514512	0.131926	0.0883905	0.0804749	0.0742084	0.0870712	0.0752
	Median	0.130607	0.162269	0.162269	0.192612	0.113457	0.14314	0.153034	0.234828	0.159631	0.124011	0.183377	0.147757	0.15699
	Average	0.183	0.203	0.198	0.225	0.168	0.202	0.206	0.247	0.185	0.171	0.219	0.201	0.20072
	3rd Quartile	0.26814	0.316623	0.283311	0.391821	0.262533	0.287929	0.343008	0.360158	0.242744	0.230871	0.349604	0.295515	0.30739
	Maximum	0.5	0.5	0.5	0.5	0.5	0.5	0.5	0.497362	0.498681	0.5	0.5	0.5	0.5
Distribution of heterozygosity	Minimum	0.0422164	0.0369393	0.0343008	0.0290238	0.0422164	0.0343008	0.0422164	0.0369393	0.0422164	0.0422164	0.0395778	0.0290238	0.02902
	1st Quartile	0.121372	0.131926	0.12467	0.153034	0.108179	0.17942	0.0949868	0.224274	0.171504	0.150396	0.134565	0.163588	0.13984
	Median	0.221636	0.271768	0.269129	0.298153	0.218997	0.25066	0.253298	0.361478	0.266491	0.218997	0.290237	0.253298	0.25858
	Average	0.268	0.307	0.281	0.34	0.281	0.292	0.289	0.343	0.308	0.261	0.305	0.296	0.29466
	3rd Quartile	0.387863	0.423483	0.403694	0.46438	0.401055	0.416886	0.456464	0.453826	0.337731	0.365435	0.437995	0.401055	0.41953
	Maximum	0.986807	1	1	1	0.989446	0.994723	0.994723	0.976253	0.989446	0.997362	1	0.952507	1
B
	Ho		Bin of Ho	Frequency	Percentage	Cumulative percentage
Min.	0.08743		[0.08 - 0.118]	3	0.9	0.9
1st Qu.	0.27065		[0.118 - 0.156]	4	1.2	2.1
Median	0.29296		[0.156 - 0.194]	4	1.2	3.3
Mean	0.29466		[0.194 - 0.232]	7	2.1	5.4
3rd Qu.	0.32386		[0.232 - 0.27]	61	18.3	23.7
Max.	0.41015		[0.27 - 0.308]	126	37.7	61.4
			[0.308 - 0.346]	90	26.9	88.3
			[0.346 - 0.384]	32	9.6	97.9
			[0.384 - 0.422]	7	2.1	100

## Sheet: S Table 2
Table S2. Average linkage disequilibrium (r2) between marker pairs according to chromosomes and the distance between markers, considering loci with MAF >2.5%. In italics are r2 with values less than initial r2/2
	The rice 12 chromosomes
Distance range (kb) between markers	Os01	Os02	Os03	Os04	Os05	Os06	Os07	Os08	Os09	Os10	Os11	Os12	Average	std
]0:25]	0.60998	0.620238	0.674387	0.580888	0.337683	0.608166	0.632222	0.645344	0.743757	0.541442	0.50964	0.579706	0.590288	0.0999631
]25:50]	0.448459	0.525899	0.583235	0.529743	0.2734	0.390782	0.484912	0.529109	0.585775	0.422182	0.349189	0.512763	0.469621	0.0956964
]50:75]	0.457922	0.514961	0.567303	0.36633	0.377851	0.470108	0.476309	0.451253	0.450084	0.44031	0.332795	0.426084	0.444276	0.0642131
]75:100]	0.406113	0.46359	0.591472	0.35095	0.265177	0.433476	0.471388	0.453505	0.445803	0.427763	0.33158	0.465675	0.425541	0.0822638
]100:150]	0.38685	0.451055	0.5051	0.332541	0.394065	0.433091	0.404714	0.449829	0.432906	0.428757	0.300854	0.42812	0.412324	0.0545389
]150:200]	0.380491	0.434768	0.478344	0.310005	0.479905	0.457395	0.420522	0.448475	0.450152	0.391847	0.294197	0.356933	0.408586	0.062539
]200:250]	0.318623	0.385992	0.451271	0.338286	0.363119	0.40002	0.357622	0.429495	0.393539	0.392851	0.273127	0.381636	0.373798	0.0482138
]250:300]	0.303366	0.389518	0.43658	0.331035	0.33456	0.372341	0.384304	0.360344	0.360022	0.385119	0.248853	0.331905	0.353162	0.0480391
]300:400]	0.269049	0.347383	0.391998	0.269782	0.325832	0.334029	0.337142	0.338314	0.378556	0.299393	0.218113	0.303961	0.317796	0.0489385
]400:500]	0.230539	0.304627	0.379864	0.25809	0.301528	0.313955	0.330568	0.32318	0.332409	0.289574	0.205921	0.223897	0.291179	0.0518017
]500:750]	0.197776	0.265489	0.327408	0.256479	0.239084	0.262856	0.278957	0.294149	0.364584	0.245165	0.186412	0.229594	0.262329	0.0503279
]750:1000]	0.164872	0.244804	0.248123	0.196843	0.111428	0.197358	0.181507	0.252761	0.354537	0.19379	0.167736	0.154427	0.205682	0.0626647

## Sheet: S Table 3
Table S3. Summary of the cross-validation (CV) procedures used in the study. Calibration set represents the number of lines in the respective sites (PAL and SRO) and is not the total number of lines representing either PAL or SRO or both sites. Validation set represents the number of lines with no phenotype in SRO considered for the valiation
CV method	Set size (s)	Calibration set			Validation Set
		PAL	SRO	ntot
SINsr	25	0	25	25	100	validation on lines with no PAL observation
	50	0	50	50	100
	100	0	100	100	100
	200	0	200	200	100
BAL1	25	25	25	25	100
	50	50	50	50	100
	100	100	100	100	100
	200	200	200	200	100
BAL2	25	25	25	37.5	100
	50	50	50	75	100
	100	100	100	150	100
	200	200	200	300	34
IMB	25	334	25	334	100	validation on lines with PAL observations
	50	334	50	334	100
	100	334	100	334	100
	200	334	200	334	100

## Sheet: S Table 4
Table S4. Fixed effect and variance decomposition for 50 Temporal Checks randomly distributed across the design within each repetition, considering A) 50 S0:2 lines in the two sites in 2017 and 2018 trials, following the model y = mu + year + rep:year + bloc:rep:year + genotype + genotype:year + error and B) 50 S0:2 and 50 S0:3 lines in the two sites in the 2018 trials, following the model y = mu…
A
		Year effecta		Variance decompositionb
Trait	Site	2018-2017	p-value	G	p-value	GxY	p-value	(GxY)/G
FL	PAL	-2.545	**	9.54184	***	1.63858	ns	0.171726
	SRO	2.908	***	28.383	***	9.70133	ns	0.3418
PH	PAL	-4.27	***	30.6651	***	8.75847	ns	0.285616
	SRO	-7.222	***	14.8749	***	2.54942	ns	0.171391
YLD	PAL	457.519	***	2050.98	***	0.00423295	ns	2.06386e-06
	SRO	-75.879	***	2295.96	***	196.298	ns	0.0854971
ZN	PAL	0.145	**	1.67891	***	4.31925e-07	ns	2.57265e-07
	SRO	2.231	***	3.8186	***	1.35926	ns	0.355958
a 2018-2017: difference between year 2018 and 2017
b G: genetic variance; GxY: genotype by year interaction variance; (GxY)/G ratio of the genetic variance and the genotype by year interaction variance
B
		Generation effecta		Variance decompositionb
Trait	Site	S0:3-S0:2	p-value	G	p-value	GxGen	p-value	(GxGen)/G
FL	PAL	0.624	ns	16.9493	***	1.6e-06	ns	9.4399e-08
	SRO	0.5	ns	14.6955	***	0.292133	ns	0.019879
PH	PAL	0.245	ns	55.8189	***	2.52982e-05	ns	4.5322e-07
	SRO	-0.381	ns	27.4025	***	1.6e-06	ns	5.83888e-08
YLD	PAL	29.167	ns	1626.61	***	1.6e-06	ns	9.83642e-10
	SRO	-2.166	ns	1555.21	***	211.782	ns	0.136176
ZN	PAL	-0.221	ns	2.64215	***	0.128942	ns	0.0488018
	SRO	0.297	ns	4.24788	***	0.24756	ns	0.0582784
a S0:3-S0:2: difference between generation S0:3 and S0:2
b G: genetic variance; GxGen: genotype by generation interaction variance; (GxGen)/G ratio of the genetic variance and the genotype by generation interaction variance

## Sheet: S Table 5
Table S5. Average predictive ability for the SINSRO scenarios across all traits, years, GP methods and calibration set sizes
		2017						2018					General Mean
Trait		25	50	100	200	Mean		25	50	100	200	Mean
FL	Mean	0.194093	0.256945	0.277786	0.327091	0.263979		0.2633	0.3114	0.356806	0.41303	0.336134	0.300056
	GBLUP	0.183629	0.242256	0.257216	0.322325	0.251357		0.256659	0.300455	0.350519	0.404227	0.327965	0.289661
	RKHS	0.204557	0.271633	0.298356	0.331857	0.276601		0.269942	0.322344	0.363094	0.421833	0.344303	0.310452
PH	Mean	0.154578	0.235235	0.347272	0.464152	0.300309		0.244047	0.322401	0.394086	0.465528	0.356516	0.328413
	GBLUP	0.15837	0.232124	0.359696	0.469232	0.304855		0.247283	0.312848	0.380338	0.458218	0.349672	0.327264
	RKHS	0.150786	0.238346	0.334848	0.459073	0.295763		0.240811	0.331954	0.407835	0.472839	0.363359	0.329561
YLD	Mean	0.175843	0.234306	0.318391	0.386891	0.278858		0.171438	0.230548	0.305563	0.351289	0.264709	0.271784
	GBLUP	0.184309	0.245754	0.31974	0.389657	0.284865		0.170178	0.223512	0.312397	0.352627	0.264679	0.274772
	RKHS	0.167377	0.222858	0.317043	0.384125	0.272851		0.172697	0.237583	0.298729	0.34995	0.26474	0.268795
ZN	Mean	0.173298	0.225016	0.282589	0.356176	0.259269		0.12709	0.196545	0.240486	0.316009	0.220033	0.239651
	GBLUP	0.167426	0.218708	0.275543	0.35113	0.253202		0.136015	0.197934	0.228982	0.309336	0.218067	0.235634
	RKHS	0.179169	0.231324	0.289634	0.361222	0.265337		0.118165	0.195156	0.25199	0.322681	0.221998	0.243668

## Sheet: S Table 6
Table S6. Average predictive ability for the SINSRO, BAL1 and BAL2 scenarios across all traits, years and calibration set sizes using GBLUP
		2017						2018					General mean
Trait		25	50	100	200	Mean		25	50	100	200	Mean
FL	Mean	0.188115	0.230144	0.261464	0.334575	0.253574		0.252925	0.312349	0.36391	0.412653	0.335459	0.294517
	BAL1	0.185124	0.225444	0.25397	0.312713	0.244313		0.241752	0.315522	0.362164	0.412042	0.33287	0.288591
	BAL2	0.195592	0.22273	0.273205	0.368685	0.265053		0.260365	0.321069	0.379048	0.42169	0.345543	0.305298
	SINSRO	0.183629	0.242256	0.257216	0.322325	0.251357		0.256659	0.300455	0.350519	0.404227	0.327965	0.289661
PH	Mean	0.180566	0.26844	0.371961	0.467137	0.322026		0.254366	0.322258	0.390324	0.466683	0.358408	0.340217
	BAL1	0.184148	0.27007	0.364401	0.471726	0.322586		0.237838	0.313007	0.376368	0.461387	0.34715	0.334868
	BAL2	0.199179	0.303127	0.391787	0.460454	0.338637		0.277977	0.340918	0.414265	0.480445	0.378401	0.358519
	SINSRO	0.15837	0.232124	0.359696	0.469232	0.304855		0.247283	0.312848	0.380338	0.458218	0.349672	0.327264
YLD	Mean	0.18823	0.255843	0.329736	0.411468	0.296319		0.167398	0.23	0.313468	0.375462	0.271582	0.283951
	BAL1	0.177134	0.25755	0.33002	0.411617	0.29408		0.151928	0.223211	0.312012	0.393118	0.270067	0.282074
	BAL2	0.203247	0.264226	0.339447	0.433131	0.310012		0.180088	0.243277	0.315994	0.38064	0.28	0.295006
	SINSRO	0.184309	0.245754	0.31974	0.389657	0.284865		0.170178	0.223512	0.312397	0.352627	0.264679	0.274772
ZN	Mean	0.163316	0.229474	0.285328	0.359063	0.259295		0.135686	0.182411	0.249098	0.320161	0.221839	0.240567
	BAL1	0.157323	0.219749	0.284698	0.34446	0.251557		0.133367	0.155904	0.23928	0.324265	0.213204	0.232381
	BAL2	0.165198	0.249966	0.295744	0.381599	0.273127		0.137675	0.193396	0.279031	0.326882	0.234246	0.253686
	SINSRO	0.167426	0.218708	0.275543	0.35113	0.253202		0.136015	0.197934	0.228982	0.309336	0.218067	0.235634

## Sheet: S Table 7
Table S7. Average predictive ability for the SINSRO and IMB scenarios across all traits, years and calibration set sizes using GBLUP
		2017						2018					General mean
Trait		25	50	100	200	Mean		25	50	100	200	Mean
FL	Mean	0.340744	0.36767	0.368253	0.405625	0.370573		0.452626	0.468174	0.489335	0.520142	0.482569	0.426571
	IMB	0.497859	0.493084	0.479289	0.488925	0.489789		0.648594	0.635892	0.628152	0.636057	0.637174	0.563481
	SINSRO	0.183629	0.242256	0.257216	0.322325	0.251357		0.256659	0.300455	0.350519	0.404227	0.327965	0.289661
PH	Mean	0.341308	0.386498	0.456243	0.522359	0.426602		0.463579	0.498309	0.537911	0.584233	0.521008	0.473805
	IMB	0.524247	0.540872	0.55279	0.575487	0.548349		0.679874	0.683769	0.695484	0.710249	0.692344	0.620346
	SINSRO	0.15837	0.232124	0.359696	0.469232	0.304855		0.247283	0.312848	0.380338	0.458218	0.349672	0.327264
YLD	Mean	0.228049	0.275061	0.336494	0.401635	0.31031		0.210843	0.27112	0.339567	0.387384	0.302228	0.306269
	IMB	0.271788	0.304367	0.353247	0.413614	0.335754		0.251507	0.318728	0.366736	0.422141	0.339778	0.337766
	SINSRO	0.184309	0.245754	0.31974	0.389657	0.284865		0.170178	0.223512	0.312397	0.352627	0.264679	0.274772
ZN	Mean	0.276369	0.314079	0.355581	0.411127	0.339289		0.289463	0.329173	0.356111	0.409234	0.345995	0.342642
	IMB	0.385312	0.409451	0.435618	0.471123	0.425376		0.442911	0.460413	0.48324	0.509132	0.473924	0.44965
	SINSRO	0.167426	0.218708	0.275543	0.35113	0.253202		0.136015	0.197934	0.228982	0.309336	0.218067	0.235634

## Sheet: S Table 8
Table S8. Average predictive ability for the BAL1, BAL2, IMB and IMB scenarios across all traits, years and calibration set sizes using RKHS
		2017						2018					General mean
Trait		25	50	100	200	Mean		25	50	100	200	Mean
FL	Mean	0.252485	0.281525	0.297528	0.322265	0.288451		0.363712	0.402859	0.439403	0.468702	0.418669	0.35356
	BAL1	0.116622	0.146836	0.171033	0.185826	0.155079		0.243915	0.290897	0.349172	0.379806	0.315948	0.235513
	BAL2	0.135681	0.155803	0.168119	0.215414	0.168754		0.253926	0.310687	0.357062	0.383615	0.326323	0.247538
	IMB	0.553081	0.551827	0.552604	0.555963	0.553369		0.687067	0.687509	0.688282	0.689551	0.688102	0.620736
	SINSRO	0.204557	0.271633	0.298356	0.331857	0.276601		0.269942	0.322344	0.363094	0.421833	0.344303	0.310452
PH	Mean	0.275836	0.339055	0.413118	0.480248	0.377064		0.363115	0.422298	0.479861	0.541751	0.451756	0.41441
	BAL3	0.190792	0.267359	0.357297	0.443425	0.314718		0.23068	0.313929	0.388094	0.478169	0.352718	0.333718
	BAL4	0.217106	0.299304	0.40035	0.446572	0.340833		0.29116	0.350046	0.422094	0.502622	0.391481	0.366157
	IMB	0.54466	0.551212	0.559976	0.571921	0.556942		0.689809	0.693263	0.70142	0.713376	0.699467	0.628205
	SINSRO	0.150786	0.238346	0.334848	0.459073	0.295763		0.240811	0.331954	0.407835	0.472839	0.363359	0.329561
YLD	Mean	0.191713	0.24177	0.317543	0.380506	0.282883		0.183227	0.244398	0.303975	0.37554	0.276785	0.279834
	BAL5	0.144587	0.204675	0.309922	0.364402	0.255896		0.140703	0.22326	0.282819	0.395095	0.260469	0.258183
	BAL6	0.179765	0.241125	0.318332	0.411309	0.287633		0.166758	0.230984	0.30868	0.388077	0.273625	0.280629
	IMB	0.275125	0.298421	0.324876	0.362186	0.315152		0.252751	0.285764	0.325672	0.369039	0.308307	0.311729
	SINSRO	0.167377	0.222858	0.317043	0.384125	0.272851		0.172697	0.237583	0.298729	0.34995	0.26474	0.268795
ZN	Mean	0.220213	0.258322	0.289161	0.327527	0.273805		0.196446	0.238194	0.272086	0.293023	0.249937	0.261871
	BAL7	0.123624	0.176392	0.214617	0.247539	0.190543		0.106022	0.139301	0.175841	0.196256	0.154355	0.172449
	BAL8	0.163949	0.206461	0.229569	0.276048	0.219007		0.10195	0.155699	0.195689	0.18869	0.160507	0.189757
	IMB	0.41411	0.419109	0.422822	0.425298	0.420335		0.459646	0.462621	0.464825	0.464463	0.462889	0.441612
	SINSRO	0.179169	0.231324	0.289634	0.361222	0.265337		0.118165	0.195156	0.25199	0.322681	0.221998	0.243668
